CORRECTION

# Correction: Atheists and Agnostics Are More Reflective than Religious Believers: Four Empirical Studies and a Meta-Analysis

Gordon Pennycook, Robert M. Ross, Derek J. Koehler, Jonathan A. Fugelsang

There is an error in one of the correlations ( $r$ ) between Cognitive Reflection Test (CRT) performance and belief in God in Table 6, Fig 3 and Fig 4. The correct correlation, from Gervais [5], is  $-.16$ . Please see the corrected [Table 6](#), [Fig 3](#) and [Fig 4](#) below.

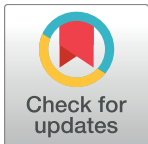

 OPEN ACCESS

**Citation:** Pennycook G, Ross RM, Koehler DJ, Fugelsang JA (2017) Correction: Atheists and Agnostics Are More Reflective than Religious Believers: Four Empirical Studies and a Meta-Analysis. PLoS ONE 12(4): e0176586. <https://doi.org/10.1371/journal.pone.0176586>

**Published:** April 21, 2017

**Copyright:** © 2017 Pennycook et al. This is an open access article distributed under the terms of the [Creative Commons Attribution License](#), which permits unrestricted use, distribution, and reproduction in any medium, provided the original author and source are credited.

**Table 6. Summary of studies reporting a correlation (*r*) between a behavioral measure of analytic thinking and religiosity (variously measured).**  
Significant correlations are in bold.

| Reference                                | Study                                         | Analytic thinking measure                                      | Religiosity measure          | <i>r</i>                | <i>N</i> |
|------------------------------------------|-----------------------------------------------|----------------------------------------------------------------|------------------------------|-------------------------|----------|
| Shenhav et al. (2012) [13]               | 1*                                            | CRT (intuitive scoring)<br>w                                   | God                          | <b>.18<sup>#</sup></b>  | 882      |
|                                          |                                               |                                                                | Convinced of God's existence | <b>.15<sup>a</sup></b>  |          |
|                                          |                                               |                                                                | Immortal souls               | <b>.14</b>              |          |
| Pennycook et al. (2012) [4]              | 2*<br>1*                                      | CRT<br>Base-rate neglect                                       | God                          | <b>-.18<sup>#</sup></b> | 321      |
|                                          |                                               |                                                                | Religious belief scale       | <b>-.33<sup>#</sup></b> |          |
|                                          |                                               |                                                                | Religious belief scale       | <b>-.19</b>             |          |
| Gervais & Norenzayan (2012) [12]         | 1*                                            | CRT                                                            | Religious belief scale       | <b>-.29<sup>#</sup></b> | 267      |
|                                          |                                               |                                                                | Religious belief scale       | <b>-.31</b>             |          |
|                                          |                                               |                                                                | Religious belief scale       | <b>-.31</b>             |          |
| Pennycook et al. (2013) [20]             | 1*                                            | CRT                                                            | Intrinsic religiosity        | <b>-.22</b>             | 179      |
|                                          |                                               |                                                                | Intuitive religious belief   | <b>-.15</b>             |          |
|                                          |                                               |                                                                | Supernatural agents          | <b>-.18<sup>#</sup></b> |          |
| Kahan (2013) <sup>b</sup> [27]           | 1 <sup>§</sup>                                | CRT                                                            | Religious belief scale       | <b>-.46</b>             | 91       |
|                                          |                                               |                                                                | Importance of religion       | <b>-.15<sup>#</sup></b> |          |
|                                          |                                               |                                                                | Prayer frequency             | <b>-.12</b>             |          |
| Razmyar & Reeve (2013) <sup>c</sup> [21] | 1*                                            | CRT                                                            | Overall religiosity          | <b>-.09</b>             | 150      |
|                                          |                                               |                                                                | Overall spirituality         | <b>-.19</b>             |          |
|                                          |                                               |                                                                | Prayer frequency             | <b>-.19</b>             |          |
| Piazza & Sousa (2014) [35]               | 3*                                            | CRT (intuitive scoring)                                        | Extrinsic religiosity        | <b>-.20</b>             | 192      |
|                                          |                                               |                                                                | Intrinsic religiosity        | <b>-.24</b>             |          |
|                                          |                                               |                                                                | Fundamentalism               | <b>-.10</b>             |          |
| Pennycook et al. (2014a) [7]             | 1*                                            | CRT                                                            | Scriptural acceptance        | <b>-.17<sup>#</sup></b> | 505      |
|                                          |                                               |                                                                | Overall religiosity          | <b>.28<sup>#</sup></b>  |          |
|                                          |                                               |                                                                | Religious belief scale       | <b>-.23<sup>#</sup></b> |          |
| Pennycook et al. (2014b) [22]            | 1*<br>2 <sup>†</sup><br>3 <sup>‡</sup>        | Base-rate neglect<br>CRT<br>Base-rate neglect (rapid-response) | Religious belief scale       | <b>-.28</b>             | 78       |
|                                          |                                               |                                                                | Religious belief scale       | <b>-.26<sup>#</sup></b> |          |
|                                          |                                               |                                                                | Religious belief scale       | <b>-.29</b>             |          |
| Browne et al. (2014) <sup>d</sup> [30]   | 1*                                            | CRT                                                            | Religious belief scale       | <b>-.15</b>             | 89       |
|                                          |                                               |                                                                | Strong faith                 | <b>-.11<sup>#</sup></b> |          |
|                                          |                                               |                                                                | Spiritual thinking           | <b>-.08</b>             |          |
| Byrd (2014) <sup>e</sup> [26]            | 1 <sup>§</sup>                                | CRT (intuitive scoring)                                        | Theism                       | <b>.14<sup>#</sup></b>  | 412      |
|                                          |                                               |                                                                | Intrinsic religiosity        | <b>.04<sup>#</sup></b>  |          |
|                                          |                                               |                                                                | Intrinsic religiosity        | <b>.04<sup>#</sup></b>  |          |
| McCutcheon et al. (2014) [36]            | 1 <sup>†</sup>                                | CRT                                                            | Belief bias syllogisms       | <b>-.02</b>             | 164      |
|                                          |                                               |                                                                | Belief bias syllogisms       | <b>-.02</b>             |          |
|                                          |                                               |                                                                | Belief bias syllogisms       | <b>-.02</b>             |          |
| Baron et al. (2015) [37]                 | 4*                                            | CRT/ Belief bias syllogisms (combined)                         | God determines morality      | <b>-.32<sup>#</sup></b> | 96       |
|                                          |                                               |                                                                | God determines morality      | <b>-.32<sup>#</sup></b> |          |
|                                          |                                               |                                                                | God determines morality      | <b>-.32<sup>#</sup></b> |          |
| Gervais <sup>g</sup> (2015) [5]          | 1*<br>2*                                      | CRT                                                            | God                          | <b>-.10<sup>#</sup></b> | 787      |
|                                          |                                               |                                                                | God                          | <b>-.16<sup>#</sup></b> |          |
|                                          |                                               |                                                                | God                          | <b>-.16<sup>#</sup></b> |          |
| Pennycook et al. (2015) [10]             | 1*                                            | CRT                                                            | Religious belief scale       | <b>-.21<sup>#</sup></b> | 279      |
|                                          |                                               |                                                                | Heuristics & Biases battery  | <b>-.20</b>             |          |
|                                          |                                               |                                                                | Heuristics & Biases battery  | <b>-.20</b>             |          |
| Finley et al. (2015) [24]                | 2*<br>CRT<br>First*                           | Heuristics & Biases battery<br>CRT                             | Religious belief scale       | <b>-.34</b>             | 187      |
|                                          |                                               |                                                                | Religious belief scale       | <b>-.34</b>             |          |
|                                          |                                               |                                                                | Religious belief scale       | <b>-.34</b>             |          |
| Finley et al. (2015) [24]                | CRT<br>First*<br>Belief<br>First <sup>§</sup> | CRT                                                            | Intrinsic religiosity        | <b>-.17</b>             | 410      |
|                                          |                                               |                                                                | Intrinsic religiosity        | <b>-.17</b>             |          |
|                                          |                                               |                                                                | Intrinsic religiosity        | <b>-.17</b>             |          |
| Finley et al. (2015) [24]                | First*<br>Belief<br>First <sup>§</sup>        | CRT                                                            | Intuitive religious belief   | <b>-.23</b>             | 410      |
|                                          |                                               |                                                                | Intuitive religious belief   | <b>-.23</b>             |          |
|                                          |                                               |                                                                | Intuitive religious belief   | <b>-.23</b>             |          |
| Finley et al. (2015) [24]                | First*<br>Belief<br>First <sup>§</sup>        | CRT                                                            | Supernatural agents          | <b>-.19<sup>#</sup></b> | 410      |
|                                          |                                               |                                                                | Supernatural agents          | <b>-.19<sup>#</sup></b> |          |
|                                          |                                               |                                                                | Supernatural agents          | <b>-.19<sup>#</sup></b> |          |
| Finley et al. (2015) [24]                | First*<br>Belief<br>First <sup>§</sup>        | CRT                                                            | Intrinsic religiosity        | <b>.04</b>              | 410      |
|                                          |                                               |                                                                | Intrinsic religiosity        | <b>.04</b>              |          |
|                                          |                                               |                                                                | Intrinsic religiosity        | <b>.04</b>              |          |
| Finley et al. (2015) [24]                | First*<br>Belief<br>First <sup>§</sup>        | CRT                                                            | Intuitive religious belief   | <b>&lt;.01</b>          | 410      |
|                                          |                                               |                                                                | Intuitive religious belief   | <b>&lt;.01</b>          |          |
|                                          |                                               |                                                                | Intuitive religious belief   | <b>&lt;.01</b>          |          |
| Finley et al. (2015) [24]                | First*<br>Belief<br>First <sup>§</sup>        | CRT                                                            | Supernatural agents          | <b>-.03<sup>#</sup></b> | 410      |
|                                          |                                               |                                                                | Supernatural agents          | <b>-.03<sup>#</sup></b> |          |
|                                          |                                               |                                                                | Supernatural agents          | <b>-.03<sup>#</sup></b> |          |

(Continued)

Table 6. (Continued)

| Reference                       | Study          | Analytic thinking measure | Religiosity measure    | <i>r</i>                | <i>N</i>                |
|---------------------------------|----------------|---------------------------|------------------------|-------------------------|-------------------------|
| Lindeman & Lipsanen (2016) [28] | 1 <sup>§</sup> | CRT                       | Religious belief scale | <b>-.22<sup>#</sup></b> | 3044                    |
| Jack et al. (in press) [29]     | 1 <sup>§</sup> | CRT                       | God                    | <b>-.15<sup>#</sup></b> | 236                     |
|                                 | 2 <sup>§</sup> | CRT                       | God                    | <b>-.25<sup>#</sup></b> | 233                     |
|                                 | 3 <sup>*</sup> | CRT                       | God                    | <b>-.22<sup>#</sup></b> | 159                     |
|                                 | 4 <sup>§</sup> | CRT                       | God                    | <b>-.24<sup>#</sup></b> | 527                     |
|                                 | 5 <sup>†</sup> | CRT                       | God                    | <b>-.23<sup>#</sup></b> | 69                      |
|                                 | 6 <sup>*</sup> | CRT                       | God                    | <b>-.16<sup>#</sup></b> | 459                     |
|                                 | 8 <sup>*</sup> | CRT                       | God                    | <b>-.17<sup>#</sup></b> | 371                     |
|                                 | Current study  | 1 <sup>†</sup>            | CRT                    | Religious belief scale  | <b>-.26<sup>#</sup></b> |
|                                 |                | Base-rate neglect         |                        | <b>-.23</b>             |                         |
|                                 | 2 <sup>†</sup> | CRT                       | Religious belief scale | <b>-.21<sup>#</sup></b> | 148                     |
|                                 |                | Base-rate neglect         |                        | <b>-.25</b>             | 149                     |
|                                 | 3 <sup>†</sup> | CRT                       | Religious belief scale | <b>-.17<sup>#</sup></b> | 277                     |
|                                 |                | Heuristics/biases         |                        | <b>-.16</b>             |                         |
|                                 | 4 <sup>†</sup> | CRT                       | Religious belief scale | <b>-.23<sup>#</sup></b> | 267                     |
|                                 |                | Heuristics/biases         |                        | <b>-.21</b>             |                         |

<sup>a</sup> Value is a point biserial correlation coefficient (dichotomous variable).

<sup>b</sup> These values were computed by the present authors using Kahan's (2013) [27] data, which were available online through the Society of Judgment and Decision Making website (<http://journal.sjdm.org/vol8.4.html>).

<sup>c</sup> Some of these measures of religiosity relate to aspects of religious practice and commitment and not religious belief (see [11]).

<sup>d</sup> The CRT was administered via phone interview in this study and performance was exceptionally low. This may explain the attenuated correlations.

<sup>e</sup> This analysis excludes participants who had previous knowledge of the CRT. Around half of the sample includes philosophers either with a PhD or who were in a PhD program at the time of the study. Participants in this study were given the CRT before the theism measure, but with a personality task in-between.

<sup>f</sup> The measures were completed in a paper-and-pencil study and the order of the pages was varied (no order analyses were reported).

<sup>g</sup> These values were computed by the present authors using Gervais' (2015) [5] data, which were available online through the author's website (<http://willgervais.com/journal-articles/>). Participants with missing data for any CRT item were removed from analysis.

\* Indicates that the religious belief measure was administered after the analytic thinking measure.

§ Indicates that the religious belief measure was administered before the analytic thinking measure.

† Indicates that the religious belief measure was administered in a separate session as the analytic thinking measure.

# Indicates that the correlation was included in the meta-analysis.

Note: This table does not include correlations between religious belief and self-report measures of analytic thinking disposition (e.g., [38]).

<https://doi.org/10.1371/journal.pone.0176586.t001>

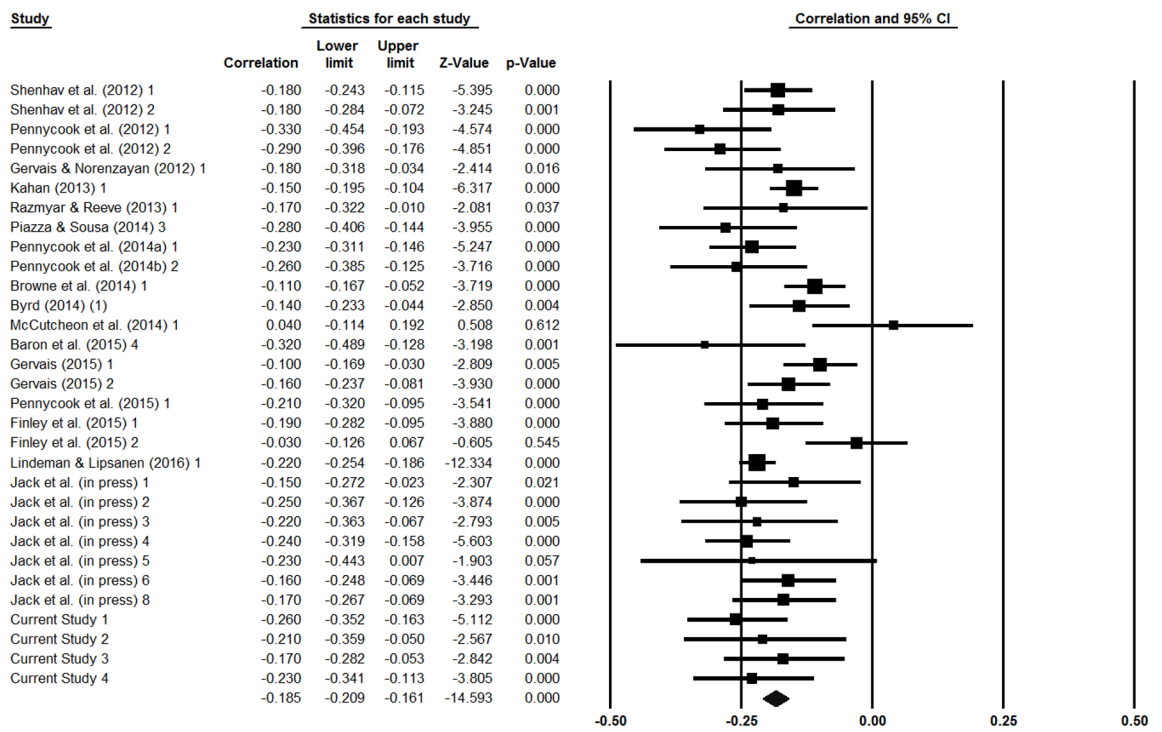

Meta Analysis

Fig 3. Forest plot of random effect meta-analysis showing effect sizes (r) for the association between religious belief scales and performance on the CRT.

<https://doi.org/10.1371/journal.pone.0176586.g001>

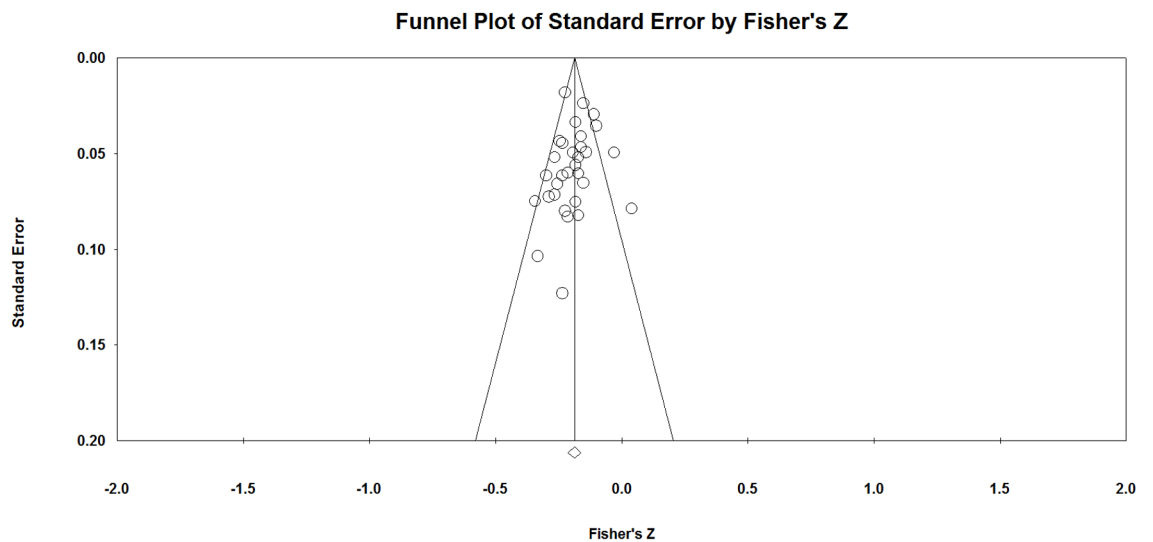

Fig 4. Funnel plot of standard error by Fisher's Z.

<https://doi.org/10.1371/journal.pone.0176586.g002>

## Reference

1. Pennycook G, Ross RM, Koehler DJ, Fugelsang JA (2016) Atheists and Agnostics Are More Reflective than Religious Believers: Four Empirical Studies and a Meta-Analysis. PLoS ONE 11(4): e0153039. <https://doi.org/10.1371/journal.pone.0153039> PMID: 27054566
